## 1 **A mechanistic hydro-epidemiological model of liver fluke risk**

2 Ludovica Beltrame<sup>1\*</sup>, Toby Dunne<sup>1</sup>, Hannah Rose Vineer<sup>2,3,4</sup>, Josephine G. Walker<sup>2,5</sup>, Eric R.  
3 Morgan<sup>4,6</sup>, Peter Vickerman<sup>5</sup>, Catherine M. McCann<sup>7</sup>, Diana J.L. Williams<sup>8</sup>, Thorsten Wagener<sup>1,4</sup>

4  
5 <sup>1</sup> *Department of Civil Engineering, University of Bristol, Bristol, UK*

6 <sup>2</sup> *School of Biological Sciences, University of Bristol, Bristol, UK*

7 <sup>3</sup> *Bristol Veterinary School, University of Bristol, Bristol, UK*

8 <sup>4</sup> *Cabot Institute, University of Bristol, Bristol, UK*

9 <sup>5</sup> *Bristol Medical School, University of Bristol, Bristol, UK*

10 <sup>6</sup> *School of Biological Sciences, Queen's University Belfast, Belfast, UK*

11 <sup>7</sup> *Epidemiology Research Unit, Scotland's Rural College, Inverness, UK*

12 <sup>8</sup> *Institute of Infection and Global Health, University of Liverpool, Liverpool, UK*

13

14 \* [ludovica.beltrame@bristol.ac.uk](mailto:ludovica.beltrame@bristol.ac.uk)

15

### 16 **Abstract**

17

18 The majority of existing models for predicting disease risk in response to climate change are  
19 empirical. These models exploit correlations between historical data, rather than explicitly  
20 describing relationships between cause and response variables. Therefore, they are unsuitable for  
21 capturing impacts beyond historically observed variability and cannot be employed to assess  
22 interventions. In this study, we integrate environmental and epidemiological processes into a new  
23 mechanistic model, taking the widespread parasitic disease of fasciolosis as an example. The model  
24 simulates environmental suitability for disease transmission, explicitly linking the parasite life-cycle  
25 to key weather-water-environment conditions. First, using epidemiological data, we show that the  
26 model can reproduce observed infection levels in time and space over two case studies in the UK.  
27 Second, to overcome data limitations, we propose a calibration approach based on Monte Carlo  
28 sampling and expert opinion, which allows constraint of the model in a process-based way, including  
29 a quantification of uncertainty. Finally, comparison with information from the literature and a  
30 widely-used empirical risk index shows that the simulated disease dynamics agree with what has  
31 been traditionally observed, and that the new model gives better insight into the time-space  
32 patterns of infection, which will be valuable for decision support.

33

34 **Keywords:** Water-based disease, environmental drivers, mechanistic modelling, spatio-temporal  
35 dynamics, fasciolosis.

## 36 1. Introduction

37

38 The transmission of several highly pathogenic infectious diseases is closely linked to weather and  
39 environmental conditions (1). Waterborne diseases, such as cholera, are directly affected by hydro-  
40 meteorological factors such as rainfall, through transport and dissemination of the pathogens, and  
41 water temperature, through their development and survival rates. Diseases involving a vector or  
42 intermediate host as part of their life-cycle, such as schistosomiasis, are controlled by characteristics  
43 of the water environment and land surface also indirectly, through their influence on the vector or  
44 host (2,3).

45

46 Our environment is changing at unprecedented rate due to climate change and direct human  
47 activities (4,5), with implications for the behaviour, lifespans and distribution of these diseases and  
48 their carriers (6,7). Evidence of climate and environmental-driven changes in the phenology of  
49 pathogens and incidence of diseases already exists. The increase in frequency and intensity of  
50 extreme weather events is altering the occurrence of floods and droughts, changing the  
51 concentration of infectious agents such as *Vibrio cholerae* in the water environment and human  
52 exposure to infection (3). Similarly, changes in the prevalence of schistosomiasis have been  
53 observed due to the expansion of the snail intermediate host habitat, following the construction of  
54 dams and implementation of irrigation schemes to meet demands for food and energy from  
55 increasing numbers of people (8).

56

57 As climate change accelerates and other human-caused disturbances increase, it is urgent to assess  
58 impacts on disease transmission, to guide interventions to reduce and/or mitigate risk (9). To this  
59 end, we need to: (a) understand the mechanisms by which the environment affects the  
60 epidemiological processes, addressing the system as a whole, (b) represent these processes with  
61 models that are explicit in space and time, to more reliably simulate conditions beyond historically  
62 observed variability, and (c) test these models in new ways, since simply reproducing past  
63 observations may no longer be sufficient to justify their use for decision support (1,3,7,10-12).

64

65 However, most current models for predicting changes to disease patterns in response to climate  
66 change are empirical (7,13,14). This means they do not explicitly represent mechanisms, but are  
67 based on statistical correlations between historical data, thus becoming unreliable when  
68 extrapolated to novel conditions, e.g. into different regions or future climates (15). Moreover,  
69 empirical models do not allow for what-if analyses, i.e. they cannot be used to test the effect of  
70 interventions on disease incidence, which would be valuable for supporting decision-making  
71 (10,16).

72

73 In this paper, we incorporate knowledge of environmental and epidemiological processes into a  
74 new integrated mechanistic model, using fasciolosis as an example. This is a globally distributed  
75 parasitic disease of livestock and zoonosis, whose most widespread agent is *Fasciola hepatica*, the  
76 common liver fluke (17). Clinical signs of disease in animals include weight loss, anaemia and sudden  
77 death, while sub-clinical infections result in lowered productivity and are estimated to cost the  
78 livestock industry \$3 billion per year, globally (18,19). Risk of infection with liver fluke is strongly  
79 influenced by weather and environmental conditions, especially temperature and soil moisture, as  
80 the parasite has an indirect life-cycle involving an intermediate host (in the case of *F. hepatica*, the  
81 amphibious mud snail *Galba truncatula*) and free-living stages, which grow and develop in the  
82 environment (20-22).

83

84 Addressing fasciolosis is urgent for a number of reasons. First, resistance to available antiparasitic  
85 drugs is on the rise worldwide, making disease control challenging (23). Secondly, increases in  
86 disease prevalence, expansions into new areas and shifts in its seasonality have been observed in  
87 recent years and attributed to altered temperature and rainfall patterns, raising concerns about the  
88 effects of climate change in the future (23,24). Finally, it is emerging as a major disease in humans,  
89 with at least 2.4 million people infected around the world, and human treatment relying on the  
90 same veterinary drug to which resistance is increasing (25). Climate-based fluke risk models have  
91 been developed since the 1950s (20,26-28). The Ollerenshaw Index is the best-known example and  
92 is still actively used to predict disease severity in Europe (20,29,30). However, these models are  
93 empirical and therefore of little use for assessing risk under changing conditions. On the other hand,  
94 previous attempts to model fasciolosis mechanistically, in connection with climate, neglect the role  
95 of soil moisture dynamics in driving infection and do not account for the spatial aspect of the disease  
96 (e.g. 19,31).

97  
98 Therefore, in this study, we introduce a new mechanistic coupled hydro-epidemiological model for  
99 liver fluke, which explicitly represents the parasite life-cycle in time and space, linked with key  
100 environmental conditions. We then parameterise the model for two case studies in the UK and  
101 assess whether it can replicate temporal and spatial variability of observed infection levels. To  
102 overcome limitations of available epidemiological data, we propose a calibration approach that  
103 combines observations and expert knowledge. Finally, we further evaluate the model by comparing  
104 it with the widely-used empirical Ollerenshaw Index.

## 106 **2. The Hydro-Epidemiological model for Liver Fluke**

107  
108 The Hydro-Epidemiological model for Liver Fluke (HELFL) quantitatively captures the mechanisms  
109 underlying transmission of fasciolosis, explicitly describing the causal relationships between hydro-  
110 meteorological factors and biological processes, instead of simply relying on correlation. To this end,  
111 HELFL integrates TOPMODEL (32,33), an existing hydrological model which we use to simulate soil  
112 moisture dynamics, and a novel epidemiological model, which represents the parasite life-cycle.  
113 TOPMODEL is chosen because its underlying assumptions are physically realistic for humid-  
114 temperate catchments, such as UK catchments, where the dominant mechanism of runoff  
115 generation is surface saturation (32). The epidemiological model is developed based on current  
116 understanding of the life-cycle of *Fasciola hepatica* and its dependence upon soil moisture and  
117 temperature (20-22).

### 119 **2.1. Hydrological component**

120  
121 TOPMODEL is a catchment-scale rainfall-runoff model, which has been extensively used in humid-  
122 temperate areas for different applications (e.g. references in 34). The model uses temperature,  
123 rainfall and Digital Elevation Model (DEM) data to estimate, at each time step, spatially distributed  
124 soil moisture over the catchment (calculated as a saturation deficit), as well as streamflow at the  
125 catchment outlet. The model we use is based on the version explained in (33) and has seven  
126 parameters (Table 1).

127  
128 In TOPMODEL, hydrological processes through the soil are represented using a sequence of  
129 conceptual stores for which the model estimates water balances. An interception store,  
130 representing vegetation cover, must be filled by rainfall before infiltration into the soil can occur.  
131 When water infiltrates into the soil, it first enters the root zone, from which it evaporates as a

132 function of potential evapotranspiration, maximum capacity of the store, and its actual water  
133 content. Water that is not evaporated or retained by the soil percolates to the saturated zone (i.e.  
134 the groundwater), which contributes to the channel network through subsurface flow.

135  
136 To simulate the spatial distribution of soil water content over the catchment, the water balance  
137 accounting routine described, which is lumped at the catchment scale, is integrated with spatially  
138 distributed topographic information derived from DEM data. The effect of topography is captured  
139 for each grid cell through calculation of a Topographic Index:  $TI = \ln \left( \frac{a}{\tan(\beta)} \right)$ , where  $a$  is the  
140 upslope contributing area and  $\tan(\beta)$  the local slope. The index is used as a measure of the  
141 likelihood that a grid cell becomes saturated by downslope drainage: high values occur over flat  
142 areas in valleys, which tend to saturate first, whereas low values are associated with areas at the  
143 top of hills, where there is little upslope area and slopes are steep (Figure 1). The model assumes  
144 that all points with the same index value will respond similarly, hydrologically. For computational  
145 efficiency, the distribution of TI values is then discretised into classes, so that computations are  
146 performed for each class instead of for each grid cell.

147  
148 Therefore, a saturation deficit for each TI class is calculated as a function of the catchment average  
149 saturation deficit, updated at each time step by water balance calculation, and the spatial  
150 distribution of the TIs. Rainfall that falls on saturated areas (i.e. where deficit is less than or equal  
151 to zero) cannot infiltrate into the soil and generates saturation-excess overland flow. Finally, total  
152 streamflow is calculated as the integrated subsurface flow and saturation-excess overland flow, and  
153 a gamma distribution is used to model the time delay in discharge generation at the catchment  
154 outlet, due to water moving through the river channel.

## 155 156 2.2. Epidemiological component

157  
158 The epidemiological model component of HELF represents the stages of the liver fluke life-cycle that  
159 live on pasture: eggs, miracidia, snail infections and metacercariae (Figure 2). Development and  
160 survival of these, as well as the presence of mud snails, require particular temperature conditions  
161 and wet soil. Therefore, the model takes as input variables temperature and soil moisture, as well  
162 as an egg scenario (i.e. number of embryonic eggs we assume are deposited on each TI class at each  
163 time step by infected animals), to calculate the abundance of individuals in each life-cycle stage.

164  
165 Once passed out on pasture in the faeces of infected animals, Eggs (E) develop at a temperature-  
166 dependent rate, and hatch into miracidia when both temperature and soil moisture conditions are  
167 suitable (35). Miracidia (Mi) are short lived: either they find a snail host or die within 24 hours  
168 (35,36). Therefore, progression from miracidium to the next stage is calculated as the probability of  
169 finding a snail. This is assumed to depend on soil moisture and temperature, as *Galba truncatula*  
170 snails are only found in poorly drained areas and are known to hibernate with cold weather and  
171 aestivate during hot dry periods (35). Snail infections (SI) also develop in the model as a function of  
172 both temperature and soil moisture, as development within the snail may be halted due to  
173 hibernation and aestivation (21), until parasites emerge from snails in the form of cercariae. Once  
174 attached to grass as Metacercariae (Me), these survive on pasture and retain infectivity based on  
175 temperature, with moderate weather being most favourable (35).

176  
177 Each stage, except for miracidia that only have a lifespan of one day, is represented as a pool of  
178 developing cohorts of individuals to capture maturation progress in a realistic way. Individuals in  
179 different cohorts are exposed to different environmental conditions, and therefore will develop at

180 different times (35,36). We account for this by using two state variables for each cohort within each  
181 stage: number of individuals in the cohort and “age” of the cohort. The rationale is that each cohort  
182 has a certain age, which increases with the number of days that have suitable environmental  
183 conditions, until the cohort eventually matures to the next life-cycle stage. Output from a stage is  
184 then the sum of cohorts per unit area which mature to the next one.

185

186 At each time step, development and/or survival rates for a stage are calculated based on the value  
187 of the relevant environmental conditions for that stage at that time step, and on the stage-specific  
188 requirements for development/survival, which are model parameters (Table 2). The technique  
189 employed to build the functions to calculate these rates has previously been used for modelling  
190 both liver fluke and other parasites (e.g. 19,31). For temperature-dependent rates, we use  
191 information in the literature from laboratory experiments or controlled micro-environment studies  
192 that examine the time to development or death at a range of constant temperatures. First, rates  
193 are calculated for each constant temperature from the reported e.g. time to development (i.e. rate  
194 = 1/time to development); then piecewise linear models are fitted to these rates, yielding a  
195 regression equation which can be used to estimate the daily rates based on the time series of  
196 observed temperature. For soil moisture, we adopt the same approach, assuming that development  
197 is fastest when the soil is saturated to the surface (i.e. when deficit = 0) and that there is no  
198 development above a certain maximum deficit (20,35). For stages with both temperature and soil  
199 moisture requirements, we allow for development to progress as a function of both (Figure 3).

200

### 201 2.3. Coupled model

202

203 The coupled hydro-epidemiological model runs with a daily time step and has a total of 29  
204 parameters. For each day, HELF calculates the catchment average saturation deficit based on rainfall  
205 and temperature, and derives the saturation deficit for each of 25 TI classes, based on this and the  
206 TI value for the class. Then, for each class and life-cycle stage, the model calculates the relevant  
207 development and/or survival rates, based on environmental conditions. The age of each cohort is  
208 updated based on the development rate, and, given an egg scenario, the model finally computes  
209 the number of individuals in the stage as a function of the number from the previous time step, plus  
210 the sum of the cohorts developed from the previous stage, minus those that die (Figure 4).  
211 Therefore, the model outputs are the abundances of developed eggs, snails located and infected by  
212 miracidia, developed snail infections, and infective metacercariae surviving on pasture, which  
213 represents the environmental suitability for disease transmission to grazing livestock. These  
214 variables, calculated for each TI class, are then mapped back onto each grid cell in the catchment.

215

216 With regard to the egg scenario, the current model assumes that 100 embryonic eggs are introduced  
217 on each TI class daily, over the whole simulation period. This means we are considering a scenario  
218 of continuous livestock grazing and no disease management over the catchment. However, this  
219 assumption can be easily changed: the fact that the egg scenario is a model input leaves the end-  
220 user of the model the possibility to estimate how the environmental suitability for disease  
221 transmission translates into risk of infection based on local farm management factors such as  
222 grazing season length or disease control strategy.

223

224

225

226

227

### 228 3. Study sites and data

229

230 To test HELF, we apply it to two catchments in the UK, located in South Wales and the North-West  
231 Midlands (England), respectively. The datasets employed include hydro-meteorological and  
232 epidemiological data.

233

#### 234 3.1. The Tawe and Severn Catchments

235

236 The River Tawe flows approximately 50km south-westwards from its source in the Brecon Beacons  
237 to the Bristol Channel at Swansea. The catchment is about 240km<sup>2</sup> in area, with elevation ranging  
238 from about 10 to 800m a.s.l., and most of the area characterised by a relatively impermeable  
239 bedrock. The River Severn rises in mid Wales and flows through Shropshire, Worcestershire and  
240 Gloucestershire, before also discharging into the Bristol Channel. The catchment, closed at Upton  
241 on Severn, is about 6850km<sup>2</sup> in area, with elevation range and geological characteristics similar to  
242 the Tawe (37). Both catchments have grassland as the dominant land use (Figure 5), which is  
243 extensively used for livestock farming, and are located in known fluke endemic areas (38).  
244 Moreover, these areas are predicted to become increasingly warmer and wetter on average (39),  
245 which suggests they will become even more favourable for liver fluke transmission in the future.

246

#### 247 3.2. Hydro-meteorological and epidemiological data

248

249 The hydro-meteorological dataset includes daily observations of rainfall, temperature and  
250 discharge. Gridded time series of rainfall and temperature are obtained from CEH-GEAR and the UK  
251 MetOffice, respectively. For both case studies, to run HELF, we take the average over the grid cells  
252 within the catchment. For the Tawe we use these time series for a 12-year period (1999-2010),  
253 whereas for the Severn we use 2 years of data (2013-2014), in line with the available epidemiological  
254 data periods. Observed discharge over the same years, at Ynystanglws for the Tawe and Upton-on-  
255 Severn for the Severn, are obtained from (37). DEM data for both catchments is obtained from  
256 NextMap with spatial resolution of 5m, then aggregated to 25m.

257

258 The epidemiological dataset consists of a time series from the Veterinary Investigation Diagnostic  
259 Analysis (VIDA) database for the Tawe and a spatial dataset based on Faecal Egg Counts (FECs) for  
260 the Severn. The VIDA database, compiled from reports from the UK Government's Animal and Plant  
261 Health Agency regional labs, provides diagnoses of fasciolosis made from ill or dead animals. The  
262 time series we use is the monthly number of sheep diagnosed with acute fasciolosis from the post  
263 code district areas within the Tawe catchment over 1999-2010. This data is believed to reflect well  
264 the temporal dynamics of within-year infection levels, but may not always reflect the magnitude of  
265 infection in the field, as the rate of submission of animals to the labs is influenced by multiple factors  
266 (40). In our series, no cases are reported for 2001 and values over the following years are low, which  
267 may have been affected by the 2001 outbreak of foot-and-mouth disease in the UK. On the other  
268 hand, the spatial dataset for the Severn catchment consists of 174 cattle herds, from farms within  
269 a 60km x 75km area in Shropshire, that have been classified into infected and non-infected based  
270 on FECs collected over Oct2014-Apr2015. Unlike VIDA, this is active surveillance data, and thus more  
271 likely to reflect true levels of infection. However, rather than a continuous/quantitative measure of  
272 the magnitude of infection, this dataset only provides a binary classification into positive-negative  
273 farms, at one moment in time and at a limited number of points within the catchment.

274

275

## 276 4. Model calibration and testing

277  
278 HELF comprises parameters related to aspects of the local environment and parameters related to  
279 the phenology of the parasite (Tables 1-2). Usually, ranges of values can be derived from the  
280 literature for these, rather than point estimates, partly because of their associated natural variability  
281 and partly due to uncertainty and poor understanding. This may result in different parameter sets  
282 providing equally good representations of system behaviour, with implications in terms of predictive  
283 uncertainty and limitations to the applicability of the model (15,34). Therefore, it is crucial to  
284 constrain and evaluate HELF, if we want to use it to assess disease risk in the future.

285  
286 Usually models are calibrated and validated using historic records, assuming that the data available  
287 reflect the underlying system, and that conditions in the period considered are similar to those  
288 under which the model will be used. However, this may not be sufficient if data are disinformative  
289 in some respects and/or if the purpose of the model is to simulate conditions that are significantly  
290 different to those previously observed (41).

291  
292 Our strategy involves multiple datasets and methods. On one hand, we have high quality continuous  
293 data for both the meteorology and hydrology. Therefore, we calibrate and validate the hydrological  
294 component of HELF by adopting a standard split-sampling approach (41). On the other hand, given  
295 the epidemiological data limitations mentioned in Section 3.2., our approach for constraining the  
296 epidemiological model component not only uses past observations, but also expert-driven rules.

### 297 298 4.1. Calibration and testing of the hydrological component

299  
300 To estimate TOPMODEL parameter values and evaluate its prediction capabilities, we perform a  
301 split-sample test using streamflow observations (years 2000-2006 for calibration and 2007-2010 for  
302 validation, with 1999 as warm-up period) (41). The Shuffled Complex Evolution (SCE-UA)  
303 optimisation method is employed to find the parameter set which maximises the coefficient of  
304 determination ( $R^2$ ) between simulations and observations on our catchments (42). The algorithm  
305 samples an initial population of parameter sets from *a priori* defined ranges (Table 1) and then  
306 evolves this population of sets to find the best performing one with respect to  $R^2$ .

### 307 308 4.2. Calibration and testing of the epidemiological component

309  
310 Using the best performing parameterization obtained for TOPMODEL, first, we fit the fluke  
311 component of HELF to the two epidemiological datasets and assess whether we can reproduce the  
312 observed patterns of infection, ignoring the data limitations discussed. Secondly, under the  
313 assumption that these data may be disinformative, and given that we ultimately want to use HELF  
314 to simulate fluke risk under changing conditions, we propose an alternative calibration approach  
315 based on Monte Carlo sampling and expert knowledge. Finally, we evaluate the model by comparing  
316 it to observations from previous studies and the commonly-used Ollerenshaw Index.

#### 317 318 4.2.1. Single-objective approach using epidemiological data

319  
320 To estimate parameters of the epidemiological model for the Tawe Catchment, we fit HELF to the  
321 VIDA time series by using SCE-UA to maximise the Pearson coefficient of correlation ( $r$ ) between  
322 simulated abundance of infective metacercariae and observed number of sheep infections. As the  
323 VIDA dataset only provides a single time series for the Tawe, we aggregate the simulated abundance

324 of metacercariae over the catchment, taking the average across TI classes. Moreover, to account for  
325 the delay between the variable we simulate and the observations, a lag parameter is included in the  
326 optimisation process, which is allowed to vary between 0 (no delay) and +5 months (18).

327  
328 Similarly, to estimate parameters for the Severn Catchment, we fit HELF to the FEC-based spatial  
329 dataset. First, we divide the area over which we have observations into sub-areas with a minimum  
330 of 15 data points each. Second, we use SCE-UA to find the parameter set which maximises  $r$  between  
331 the simulated percentage of grid cells at risk of infection and the observed percentage of herds  
332 infected, over each sub-area. To this end, for each parameter set, firstly, we aggregate the simulated  
333 abundance of metacercariae over months Jul-Dec2014, assuming that pasture contamination over  
334 this period will be responsible for the observed infection levels (38). Secondly, we classify the  
335 simulated abundance of metacercariae in each grid cell into two classes (no-risk and risk) by setting  
336 a threshold based on the overall observed percentage of infection.

337  
338 4.2.2. Monte Carlo sampling-based approach using expert opinion

339  
340 Given the limitations of our epidemiological datasets, we believe that simply fitting these may not  
341 be sufficient to guarantee reliability of our new model. Moreover, if HELF is to be used to assess  
342 future disease risk, its credibility should be assessed via more in-depth evaluation of the consistency  
343 with the real-world system, instead from just comparison against historical data (11). To this end,  
344 we collect information from the literature (e.g. 24,27,30) and our perceptions, to characterise the  
345 seasonality of the liver fluke life-cycle stages in the UK over years 2000-2010. This includes shifts in  
346 seasonality experienced over this period, compared to what has been traditionally observed, driven  
347 by changing temperature and rainfall patterns, but could be adjusted to account for further changes  
348 and shifts going forwards. Then, we formalise this knowledge into a set of rules:

- 349
- 350 • Rule1: retain the parameter sets that every year predict the first month of snail presence (i.e.  
351 with positive number of snails) to happen earlier than average, if temperature is above average  
352 in January-March
  - 353 • Rule2: retain the sets that every year produce higher mean number of snail infections over  
354 summer (June-August), if number of rain days over May-July is above average
  - 355 • Rule3: retain the sets that every year produce higher mean number of metacercariae over  
356 autumn (August-October), if rainfall is above average and the number of days  $>20^{\circ}\text{C}$  is below  
357 average over May-August
  - 358 • Rule4: retain the sets that every year produce higher mean number of metacercariae over  
359 winter (January-February), if total number of days  $>10^{\circ}\text{C}$  is above average over Jan-Feb

360 Finally, we sample 8000 parameter sets using uniform distributions from ranges in Table 2, and  
361 reject all the sets producing model outputs that are inconsistent with these rules.

362 4.2.3. Comparison with the Ollerenshaw Index

363  
364 To further evaluate HELF, we use the behavioural parameterisations, i.e. those retained from  
365 sequential application of the rules, and compare disease risk simulated using these with the  
366 Ollerenshaw Index. This, calculated at the monthly scale based on number of rain days, rainfall and  
367 temperature as in (29), is the current standard for providing liver fluke forecasts in the UK, where it  
368 is used by the National Animal Disease Information Service to warn farmers about high risk years  
369 (30).

370  
371



## 372 5. Results

373

### 374 5.1. Performance of the hydrological model

375

376 Comparison of simulated and observed daily streamflow shows that TOPMODEL is able to  
377 reproduce well the temporal dynamics of observations, including the peaks and recession periods  
378 of the hydrograph, with  $R^2=0.87$  during calibration and 0.84 in validation (Figure 6).

379

### 380 5.2. Performance of the epidemiological model

381

#### 382 5.2.1. Fit to epidemiological data

383

384 A delay is evident between simulated catchment average number of metacercariae and reported  
385 number of sheep diagnosed with fasciolosis from the Tawe Catchment (Figure 7). This is due to the  
386 time-lag between pasture contamination, which HELF simulates, and infection diagnosed in the  
387 animal, which the VIDA dataset reports. Except for the year 2000, for which the model predicts risk  
388 of infection that is not reflected in the VIDA numbers over 2001, HELF seems to adequately predict  
389 the observed temporal dynamics of infection. It simulates low pasture contamination for most of  
390 the period and captures the higher peaks over winters 2008-2009 and 2009-2010, driven by the  
391 preceding exceptionally wet summers and rainy autumns. The highest correlation between the two  
392 series ( $r=0.62$ ) is found at a lag of three months, which corresponds to the prepatent period of  
393 fasciolosis reported in the literature (18). If, instead of using the whole dataset for calibration, we  
394 perform a 5-fold cross-validation, mean correlation results 0.52 in calibration and 0.41 in validation.

395

396 Division of the area for which we have observations within the Severn Catchment into sub-areas  
397 with at least 15 data points each, results into 9 sub-areas (Figure 8). If we then compare the  
398 simulated percentage of grid cells at risk of infection with the observed percentage of infected  
399 herds, in each of the sub-areas, the two are in good agreement ( $r=0.83$ ), suggesting that the model  
400 can replicate the observed spatial pattern (here, performing a leave-one-out cross-validation results  
401 in a mean absolute error of 0.1). Risk of infection seems overestimated in sub-areas A2 and A5.  
402 However, these were significantly drier than the other sub-areas in 2014 (Figure S1), and have a  
403 lower percentage of area suitable for snail hosts in terms of soil pH (Figure S2), which HELF currently  
404 does not account for.

405

#### 406 5.2.2. Result of the expert-driven approach

407

408 Sequential application of the expert-driven rules reduces the initial sample of 8000 parameter sets  
409 to 14 behavioural parameterisations (Figure 9). The resulting simulated life-cycle stages show that  
410 the abundance of developed eggs on pasture tends to increase in March, as the weather warms up,  
411 before decreasing gradually over the following months, as hatching into miracidia begins (Figure  
412 10). Snail activity, and therefore infection of snails by miracidia, also seems to start in spring, and  
413 carries on until November, when frosts may send snails back into hibernation; whereas  
414 development of intra-molluscan infections peaks around August, leading to high numbers of  
415 infective metacercariae surviving on pasture in Autumn. Finally, if we compare the abundance of  
416 metacercariae - obtained using the whole set of behavioural parameterisations - with the VIDA time  
417 series, first, we still see the expected delay between simulations and observations (Figure 11).  
418 Moreover, we note that, on one hand, uncertainty is large in terms of magnitude of the yearly peak  
419 of infection. On the other hand, uncertainty bounds are narrower in terms of timing and duration

420 of the outbreaks, with the number of infective metacercariae on pasture beginning to increase in  
421 July, reaching a peak in September, before decreasing again in December, on average.

422

### 423 5.2.3. Comparison with the Ollerenshaw Index

424

425 Temporal comparison of the suitability for disease transmission simulated by HELF, constrained  
426 using the rules, with the Ollerenshaw Index, shows a time-lag of one month between the two series  
427 (Figures 12a and S3). This is due to the two models representing different things: a risk index based  
428 on monthly temperature and rainfall characteristics in the case of Ollerenshaw, and the abundance  
429 of metacercariae, based on soil moisture and accounting for the delays in the parasite life-cycle, in  
430 the case of HELF. From here we also see that, while matching the empirical index on inter-annual  
431 variation (at lag of one month,  $r=0.73$ ), the two models' responses may differ at higher temporal  
432 resolution. For example, the Ollerenshaw Index reaches the same peak value in years 2007 and  
433 2008, but risk of infection in 2007 seems lower than the following year according to HELF.  
434 Comparison of the two models in space, presented in Figure 12b for August 2006 as an example,  
435 shows the presence of high risk areas in the Tawe Catchment according to both models. However,  
436 on one hand, according to the Ollerenshaw Index, no proportion of the catchment is risk-free, and  
437 risk of infection is higher in the North-East, where rainfall levels are higher (37). In contrast, for the  
438 same month, assuming an area is at risk if its number of metacercariae is positive, HELF estimates  
439 that 17.3% of the catchment is risk-free, and that there are 134 patches at risk, spread throughout  
440 the catchment, with mean size of 1.6km<sup>2</sup>.

441

## 442 6. Discussion

443

444 In this study, we developed the first mechanistic model which simulates risk of infection with *F.*  
445 *hepatica* in time and space, driven by temperature and soil moisture dynamics. The novelty of our  
446 work lies in the description of the bio-physical processes underlying transmission of fasciolosis,  
447 advancing the study of the disease beyond empirical associations of infection levels with  
448 temperature and rainfall. Despite existing forecasting models calculating fluke risk based on these  
449 (20,29,30), soil moisture has always been recognised as the critical driver of disease transmission  
450 for its role on development of the free-living stages and presence of the snail intermediate hosts  
451 (20). Here we represented it using an existing hydrologic model, which is dynamic and based on  
452 spatially distributed topographic information, also known as an important fluke risk factor (27).  
453 Moreover, collaboration across the physical and biological sciences was necessary to analyse the  
454 effect of both soil moisture and temperature on the multiple parasite life-cycle stages (Figure 3),  
455 and translate the mechanistic understanding of the system into an integrated model (Figure 4).

456

457 By simulating the system at 25m resolution with a daily time step, HELF provides new insight into  
458 the time-space patterns of disease risk, which will be valuable for decision support. Compared to  
459 the Ollerenshaw Index, which considers each month independently from every other, HELF is  
460 dynamic. This means that high rainfall may result into high risk of infection only depending on the  
461 antecedent moisture conditions of the soil and their effect on the life-cycle progress (Fig. 12a).  
462 Moreover, by providing greater temporal resolution, HELF allows capturing the impact of short-term  
463 weather events, such as an extremely warm day or intense concentrated rainfall, which are believed  
464 to be particularly relevant for the biological system (13-15). In tandem with the fact that HELF can  
465 identify hotspots of transmission potential (Figure 12b), this means it may be possible for farmers  
466 to control the magnitude of exposure to fluke in the field, for example by altering management  
467 practices to avoid livestock grazing in high risk areas during peak metacercarial abundance. Finally,

468 the stages included in HELF make up the part of the life-cycle which is missing in the model of fluke  
469 dynamics within the final host developed in (19). Integration of the two would allow a mechanistic  
470 description of the whole cycle, providing the opportunity to assess, for example, the impact of  
471 vaccines on infection levels.

472  
473 In addition to aiding in the tools for the management of fasciolosis, HELF could also benefit the study  
474 of other diseases. The same model could be useful for rumen fluke, which is on the rise in British  
475 and Irish livestock and has a similar life-cycle to liver fluke, sharing the same intermediate host (43).  
476 On the other hand, a different hydrological model component could be employed instead of  
477 TOPMODEL, depending on the hydro-environmental drivers relevant for the disease under  
478 consideration (3). For example, a model based on freshwater would be needed for diseases  
479 involving aquatic intermediate hosts, such as freshwater snails in the case of schistosomiasis (2).

480  
481 Several assumptions are currently embedded in HELF. Notably, to account for seasonality and  
482 spatial aspect of the disease, we assumed that development of the parasite life-cycle is entirely  
483 driven by environmental conditions, simplifying the mechanisms related to the intra-molluscan  
484 stage and neglecting density-dependent processes. Moreover, even with regard to environmental  
485 factors, characteristics such as soil pH and texture have been described as potentially relevant for  
486 the presence of snail habitats (27), but have not been included in our model, yet. However, HELF  
487 could be expanded to incorporate these, as well as additional spatial data, including remote sensing  
488 information.

489  
490 To address common disease data limitations, we proposed an approach which includes the use of  
491 expert knowledge to constrain and evaluate our new model. Fitting observations is standard  
492 practice for calibration of hydrologic models, when there is a gauging station providing data to  
493 compare simulations against (Figure 6). Distributed soil moisture observations were not available  
494 for our case studies (and are rarely available anywhere, especially at high resolution), but previous  
495 studies have shown that TOPMODEL can provide good representation of the spatial pattern of  
496 saturated areas (44). Less frequently, when data is available, the same is done to parameterise  
497 epidemiological models (e.g. 16,45) (10). Our results show that HELF is flexible enough to replicate  
498 the observed time-space patterns of infection over the two case study catchments (Figures 7-8). We  
499 speculate mismatches remaining when we fit the two datasets are not necessarily due to aspects  
500 not yet included in the model only, but may also be related to data issues. The absence of reported  
501 cases for 2001 from the Tawe Catchment is believed to have been influenced by the outbreak of  
502 foot-and-mouth, which killed over 10 million cows and sheep, affecting submissions to the vet labs.  
503 Similarly, discrepancies over sub-areas A2 and A5 in the Severn Catchment may also be related to  
504 our underlying assumption of uniform distribution of farms per sub-area, which may not necessarily  
505 reflect the real-world system. Mis-reporting and data low space-time resolution are common with  
506 many diseases and have often been recognised as a bottleneck to developing models providing  
507 meaningful predictions of disease risk (12,14,16). Moreover, even if available epidemiological data  
508 were more reliable, they would still reflect historical conditions, which may not necessarily be  
509 relevant for the future (11,15). Our calibration strategy includes the use of expert-driven rules to  
510 overcome these issues. The rules represent mechanistic knowledge of the system translated into  
511 prior information about the output state variables. By using these, we can constrain aspects of the  
512 model for which no hard data is available (i.e. the different life-cycle stages) in a process-based  
513 manner, without biasing the parameters towards external drivers not included in the model. The  
514 current formulation reflects changes in seasonality experienced over our simulation period.  
515 However, going forwards, this can be adjusted to account for further changes, in order to reliably

516 assess the impact on disease risk of conditions beyond the range of previously observed variability.  
517 Our results show there are parameter sets satisfying all four our rules (Figure 9), and that the  
518 resulting behaviour of the simulated stages and lags between them (Fig. 10) agree with what has  
519 been traditionally observed in the UK (20,24). This suggests that HELF reflects well (our perception  
520 of) the real-world system. The fact that a significant number of simulations is rejected from the  
521 initial sample suggests that our parameter confinement strategy is effective, which is crucial as the  
522 inability to identify behavioural parameterisations may result in significant predictive uncertainty  
523 when using the model under changing conditions (15,34). Moreover, using HELF with Monte Carlo  
524 sampling allows explicit consideration of uncertainty, by propagating it from the parameter ranges  
525 to the model simulations. This means we can provide decision-makers with a degree of confidence  
526 to be attributed to the model results. The reason why uncertainty in the simulated risk of infection  
527 still seems high in terms of magnitude (Figure 11) is that the rules are currently based on information  
528 about the seasonality of the disease only, driven by our aim of providing a model that is generally  
529 applicable in the UK. However, if reliable local data were available, the rules could be modified or  
530 increased in number to make the model more accurate locally (as in 16,46). On the other hand, the  
531 fact that uncertainty bounds are narrow in terms of timing and duration of the outbreaks is  
532 particularly useful to inform farmers' decisions about e.g. when to allow grazing of animals or when  
533 to treat them.

## 534 535 **7. Conclusions**

536  
537 We developed and tested a new mechanistic hydro-epidemiological model to simulate the risk of  
538 liver fluke infection, linked to key weather-water-environmental processes (HELF). The fact that,  
539 unlike previous models, HELF explicitly describes the processes, rather than relying on correlation,  
540 makes it more likely robust for capturing the impact of 'new' conditions on disease risk. We showed  
541 that the model is sufficiently flexible to fit observations over two UK case studies, but also  
542 introduced an expert-driven calibration strategy to make the model more robust to data with  
543 limited reliability and in the presence of climate change. Finally, comparison with a widely-used  
544 empirical model of liver fluke risk showed that, while matching the existing index on interannual  
545 variation, HELF provides better insight into the time-space patterns of disease, which will be  
546 valuable for decision support. Driving the model with climate and management scenarios will enable  
547 assessing future risk of infection and evaluating control options to reduce and/or mitigate disease  
548 burden. This is urgent, given the widespread increasing drug resistance and threat of altered  
549 patterns of transmission due to climate-environmental change.

550  
551 Through the example of fasciolosis, we demonstrated (i) that sufficient mechanistic understanding  
552 of the bio-physical system may be available to develop and test a process-based model for an  
553 environmentally-mediated disease, without having to rely only on limited and potentially  
554 disinformative data, and (ii) how accounting for the critical hydro-environmental controls  
555 underlying transmission can be valuable to better understand seasonality and spread of emerging  
556 or re-emerging threatening diseases.

557  
558 **Data accessibility.** Underlying datasets are publically available and referenced within the paper. The FEC-based dataset is available at  
559 <http://dx.doi.org/10.17638/datacat.liverpool.ac.uk/406>. Underlying code is available at <https://github.com/ludobeltrame/helf>.

560 **Authors' contributions.** LB and TW designed research; LB, TD, HRV, ERM, JGW, PW and TW performed research; CMM and DJLW collected the FEC  
561 dataset; LB analysed data and wrote the paper with contributions by all other authors.

562 **Competing interests.** We have no competing interests.

563 **Funding.** This work is funded as part of the Water Informatics Science and Engineering Centre for Doctoral Training (WISE CDT) under EPSRC grant  
564 number EP/L016214/1. TD was supported by the Elizabeth Blackwell Institute for Health Research, University of Bristol, and the Wellcome Trust  
565 Institutional Strategic Support Fund. The FEC dataset was obtained as part of BBSRC grant number BB/K015591/1, awarded to DJLW.

566 **Acknowledgements.** We thank Sian Mitchell for advising on the VIDA dataset, as well as Philip Skuce, David Armstrong and Nerys Wright, for the  
567 input and useful discussions which allowed development of the rules.

## References

1. Altizer et al. (2006), Seasonality and the dynamics of infectious diseases, *Ecology Letters* 9:467-484. <http://dx.doi.org/10.1111/j.1461-0248.2005.00879.x>.
2. Perez-Saez et al. (2016), Hydrology and density feedbacks control the ecology of intermediate hosts of schistosomiasis across habitats in seasonal climates, *PNAS* 113:6427-6432. <http://dx.doi.org/10.1073/pnas.1602251113>.
3. Rinaldo et al. (2018), River networks as ecological corridors: A coherent ecohydrological perspective, *AWR* 112:27-58. <http://dx.doi.org/10.1016/j.advwatres.2017.10.005>.
4. Coumou and Rahmstorf (2012), A decade of weather extremes, *Nature Climate Change* 2:491-496. <http://dx.doi.org/10.1038/NCLIMATE1452>.
5. Van Loon et al. (2016), Drought in the Anthropocene, *Nature Geoscience* 9:89-91. <http://dx.doi.org/10.1038/ngeo2646>.
6. Jones et al. (2008), Global trends in emerging infectious diseases, *Nature* 451:990-993. <http://dx.doi.org/10.1038/nature06536>.
7. Wu et al (2016), Impact of climate change on human infectious diseases: Empirical evidence and human adaptation, *Environment International* 86:14-23. <http://dx.doi.org/10.1016/j.envint.2015.09.007>.
8. Steinmann et al. (2006), Schistosomiasis and water resources development: systematic review, meta-analysis, and estimates of people at risk, *Lancet Infect. Dis.* 6:411-425. [http://dx.doi.org/10.1016/S1473-3099\(06\)70521-7](http://dx.doi.org/10.1016/S1473-3099(06)70521-7).
9. World Bank (2014), Reducing climate-sensitive disease risks. Agriculture and environmental services discussion paper no.7. Washington, DC.
10. Lloyd-Smith et al. (2009), Epidemic dynamics at the human-animal interface, *Science* 326:1362-1367. <http://dx.doi.org/10.1126/science.1177345>.
11. Wagener et al. (2010), The future of hydrology: An evolving science for a changing world, *WRR* 46:W05301. <http://dx.doi.org/10.1029/2009WR008906>.
12. Fox et al. (2012), Livestock Helminths in a Changing Climate: Approaches and Restrictions to Meaningful Predictions, *Animals* 2:93-107. <http://dx.doi.org/10.3390/ani2010093>.
13. Lo Iacono et al. (2017), Challenges in developing methods for quantifying the effects of weather and climate on water-associated diseases: A systematic review. *PLoS Negl. Trop. Dis.* 11:e0005659. <https://doi.org/10.1371/journal.pntd.0005659>.
14. Urban et al. (2016), Improving the forecast for biodiversity under climate change, *Science* 353:aad8466. <http://dx.doi.org/10.1126/science.aad8466>.
15. Dormann et al. (2012), Correlation and process in species distribution models: bridging a dichotomy, *Journal of Biogeography* 39:2119–2131. <http://dx.doi.org/10.1111/j.1365-2699.2011.02659.x>.
16. Eisenberg et al. (2002), Disease Transmission Models for Public Health Decision Making: Analysis of Epidemic and Endemic Conditions Caused by Waterborne Pathogens, *Environmental Health Perspectives* 110:783-790. <http://dx.doi.org/10.1289/ehp.02110783>.
17. Mas-Coma et al. (2005), Fascioliasis and other plant-borne trematode zoonoses, *Int. J. Parasitol.* 35:1255-1278. <http://dx.doi.org/10.1016/j.ijpara.2005.07.010>.
18. Kaplan (2001), Fasciola hepatica: a review of the economic impact in cattle and considerations for control, *Veterinary Therapeutics* 2:40-50.
19. Turner et al. (2016), A model to assess the efficacy of vaccines for control of liver fluke infection, *Scientific Reports* 6:23345. <http://dx.doi.org/10.1038/srep23345>.
20. Ollerenshaw and Rowlands (1959), A method of forecasting the incidence of Fascioliasis in Anglesey, *Veterinary Record* 71:591-598.
21. Pantelouris (1963), Environmental influences on the life-cycle of the Liver-Fluke, Fasciola hepatica L., *The Irish Naturalists' Journal* 14:94-97.
22. Van Dijk et al. (2010), Climate change and infectious disease: helminthological challenges to farmed ruminants in temperate regions, *Animal* 4:377-392. <http://dx.doi.org/10.1017/s1751731109990991>.
23. Charlier et al. (2014), Recent advances in the diagnosis, impact on production and prediction of Fasciola hepatica in cattle, *Parasitology* 141:326-335. <http://dx.doi.org/10.1017/S0031182013001662>.

24. Relf et al. (2011), Temporal studies on *Fasciola hepatica* in Galba truncatula in the west of Ireland, *Veterinary Parasitology* 175:287-292. <http://dx.doi.org/10.1016/j.vetpar.2010.10.010>.
25. WHO (2017), [http://www.who.int/foodborne\\_trematode\\_infections/fascioliasis/en/](http://www.who.int/foodborne_trematode_infections/fascioliasis/en/)
26. Malone et al. (1987), Fasciolosis in cattle in Louisiana: Development of a system to predict disease risk by climate, using the Thornthwaite water budget, *Am. J. Vet. Res.* 48:1167-1170.
27. McCann et al. (2010), The development of linear regression models using environmental variables to explain the spatial distribution of *Fasciola hepatica* infection in dairy herds in England and Wales, *Int. J. Parasitol.* 40:1021-1028. <http://dx.doi.org/10.1016/j.ijpara.2010.02.009>.
28. Selemetas et al. (2014), Weather and soil type affect incidence of fasciolosis in dairy cow herds, *Veterinary Record* 175. <http://dx.doi.org/10.1136/vr.102437>.
29. Fox et al. (2011), Predicting impacts of climate change on fasciola hepatica risk, *PLoS ONE* 6:e16126. <http://dx.doi.org/10.1371/journal.pone.0016126>.
30. NADIS (2017) <http://www.nadis.org.uk/bulletins/liver-fluke-control-in-sheep.aspx>
31. Nice and Wilson (1974), A study of the effect of temperature on the growth of *Fasciola hepatica* in *Lymnaea truncatula*, *Parasitology* 68:47-56. <http://dx.doi.org/10.1017/S0031182000045364>.
32. Beven and Kirkby (1979), A physically based, variable contributing area model of basin hydrology, *Hydrological Sciences Bulletin* 24:43-69. <http://dx.doi.org/10.1080/02626667909491834>.
33. Beven et al. (1995), TOPMODEL, in *Computer Models of Watershed Hydrology*, edited by VP. Singh, pp. 627-668, Water Resour. Publ., Colorado.
34. Beven (1997), TOPMODEL: a critique, *Hydrological Processes* 11:1069-1085. [http://dx.doi.org/10.1002/\(SICI\)1099-1085\(199707\)11:9<1069::AID-HYP545>3.0.CO;2-O](http://dx.doi.org/10.1002/(SICI)1099-1085(199707)11:9<1069::AID-HYP545>3.0.CO;2-O).
35. Andrews (1999), The life cycle of *Fasciola hepatica*. In: Dalton, JP (Ed.), *Fasciolosis*. CABI Publishing. pp: 1-29.
36. Thomas (1883), The Life History of the Liver-Fluke (*Fasciola hepatica*), *Quarterly Journal of Microscopical Science* 23:99-133.
37. NRFA (2017), <http://nrfa.ceh.ac.uk/>
38. Williams et al. (2014), Liver fluke – an overview for practitioners, *Cattle Practice* 22:238-244.
39. Murphy et al. (2009), UK Climate Projections Science Report: Climate change projections. Met Office Hadley Centre, Exeter.
40. Van Dijk et al. (2008), Back to the future: Developing hypotheses on the effects of climate change on ovine parasitic gastroenteritis from historical data, *Veterinary Parasitology* 158:73-84. <https://doi.org/10.1016/j.vetpar.2008.08.006>.
41. Klemes (1986), Operational testing of hydrological simulation models, *Hydrological Sciences Journal* 31:13-24. <http://dx.doi.org/10.1080/02626668609491024>.
42. Duan et al. (1992), Effective and efficient global optimization for conceptual rainfall-runoff models, *WRR* 28:1015-1031. <http://dx.doi.org/10.1029/91WR02985>.
43. Huson et al. (2017), Paramphistomosis of Ruminants: An Emerging Parasitic Disease in Europe, *Trends in Parasitology* 33:836-844. <https://doi.org/10.1016/j.pt.2017.07.002>.
44. Güntner et al. (2004) Modeling spatial patterns of saturated areas: An evaluation of different terrain indices, *WRR* 40:W05114. <http://dx.doi.org/10.1029/2003WR002864>.
45. Bertuzzo et al. (2016), On the probability of extinction of the Haiti cholera epidemic, *Stochastic Environmental Research and Risk Assessment* 30:2043-2055. <http://dx.doi.org/10.1007/s00477-014-0906-3>.
46. Liang et al. (2005), A multi-group model of *Schistosoma japonicum* transmission dynamics and control: Model calibration and control prediction, *Tropical Medicine and International Health* 10:263-278. <http://dx.doi.org/10.1111/j.1365-3156.2005.01386.x>.

| # | Parameter | Description                                                                          | Unit                 | Min  | Max |
|---|-----------|--------------------------------------------------------------------------------------|----------------------|------|-----|
| 1 | LnTe      | Log of transmissivity of soil when saturated to the surface                          | mm <sup>2</sup> /day | -5   | 10  |
| 2 | m         | Soil parameter controlling decline of transmissivity as saturation deficit increases | mm                   | 1    | 200 |
| 3 | Srz_init  | Initial saturation deficit in root zone                                              | mm                   | 0    | 300 |
| 4 | Srz_max   | Maximum allowable saturation deficit in root zone                                    | mm                   | 5    | 300 |
| 5 | td        | Time delay from unsaturated to saturated zone                                        | day/mm               | 0    | 0.9 |
| 6 | a         | Shape parameter for gamma distribution used for routing                              | -                    | 0.01 | 5   |
| 7 | b         | Scale parameter for gamma distribution used for routing                              | -                    | 0.01 | 5   |

Table 1: Hydrological model parameters and initial ranges.

| #  | Parameter     | Description                                                                | Unit              | Min    | Max    | References     |
|----|---------------|----------------------------------------------------------------------------|-------------------|--------|--------|----------------|
| 1  | S1MinTemp     | Min temp for egg development                                               | °C                | 5      | 15     | 20, 21, 35     |
| 2  | S1PeakTemp    | Optimal temp for egg development                                           | °C                | 15     | 27     | 35, 36         |
| 3  | S1PeakRate    | Egg development rate at optimal temp                                       | day <sup>-1</sup> | 0.025  | 0.5    | 35, 36         |
| 4  | S1MortRate    | Egg mortality rate                                                         | day <sup>-1</sup> | 0      | 0.0693 | 35             |
| 5  | S1MaxTemp     | Max temp for egg development                                               | °C                | 27     | 40     | 35             |
| 6  | S1TrigSatDef  | Max saturation deficit for egg hatching                                    | mm                | 1      | 100    | 21, 35         |
| 7  | S1TrigMinTemp | Min temp for egg hatching                                                  | °C                | 5      | 15     | 21             |
| 8  | S2SatDef      | Max saturation deficit for miracidia finding snails                        | mm                | 1      | 100    | 20, 35, 36     |
| 9  | S2SatSlope    | Slope defining optimal saturation deficit for miracidia finding snails     | -                 | 0.01   | 0.5    |                |
| 10 | S2MinTemp     | Min temp for miracidia finding snails                                      | °C                | 5      | 15     | 35             |
| 11 | S2PeakTemp    | Optimal temp for miracidia finding snails                                  | °C                | 15     | 27     | 35             |
| 12 | S2MaxTemp     | Max temp for miracidia finding snails                                      | °C                | 27     | 40     | 21             |
| 13 | S3SatDef      | Max saturation deficit for snail infections development                    | mm                | 1      | 100    | 20, 35, 36     |
| 14 | S3SatSlope    | Slope defining optimal saturation deficit for snail infections development | -                 | 0.01   | 0.5    |                |
| 15 | S3MinTemp     | Min temp for snail infections development                                  | °C                | 5      | 15     | 20, 21, 30     |
| 16 | S3PeakRate    | Snail infections development rate at optimal temp                          | day <sup>-1</sup> | 0.0204 | 0.0357 | 35             |
| 17 | S3MortRate    | Snail infections mortality rate                                            | day <sup>-1</sup> | 0      | 0.0693 | -              |
| 18 | S4MinTemp     | Min temp for metacercariae survival                                        | °C                | -20    | 10     | 35 and therein |
| 19 | S4PeakTemp    | Optimal temp for metacercariae survival                                    | °C                | 10     | 15     | 35 and therein |
| 20 | S4MaxTemp     | Max temp for metacercariae survival                                        | °C                | 15     | 40     | 35 and therein |
| 21 | S4PeakRate    | Metacercariae survival rate at optimal temp                                | day <sup>-1</sup> | 0.0027 | 0.0333 | 35 and therein |
| 22 | S4MinRate     | Metacercariae survival rate at min/max temp                                | day <sup>-1</sup> | 0.0333 | 0.5    | 35 and therein |

Table 2: Epidemiological model parameters and initial ranges.

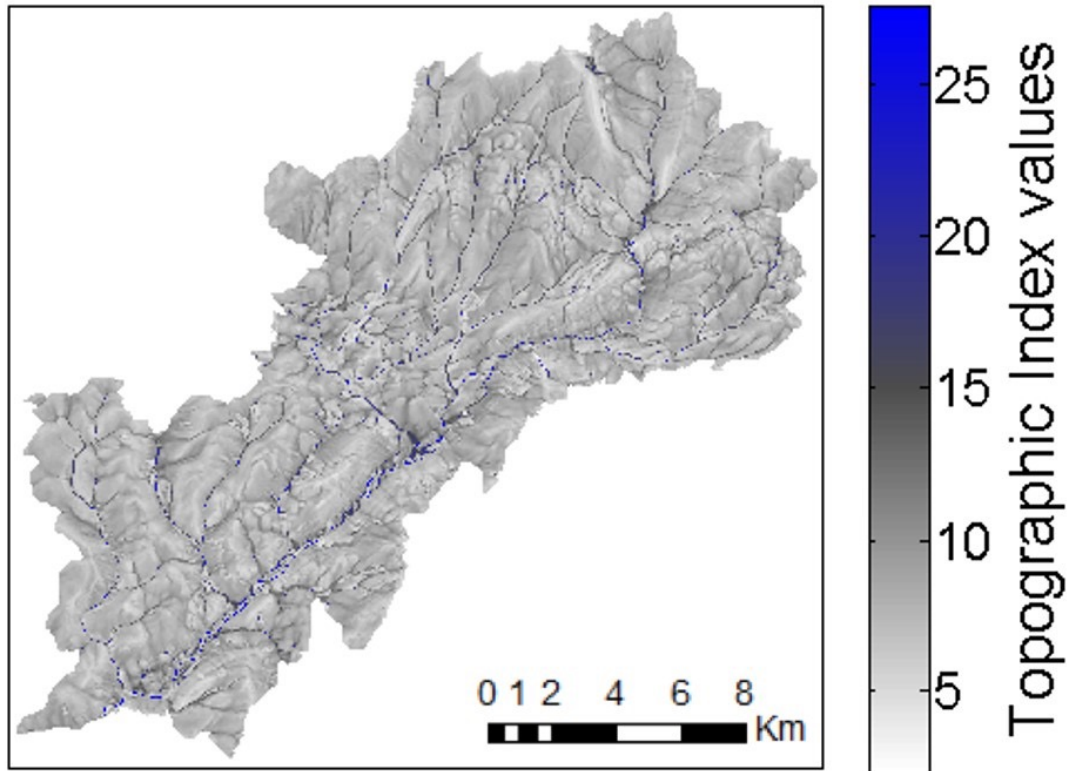

Figure 1: Spatial pattern of Topographic Index values for the River Tawe Catchment (UK).

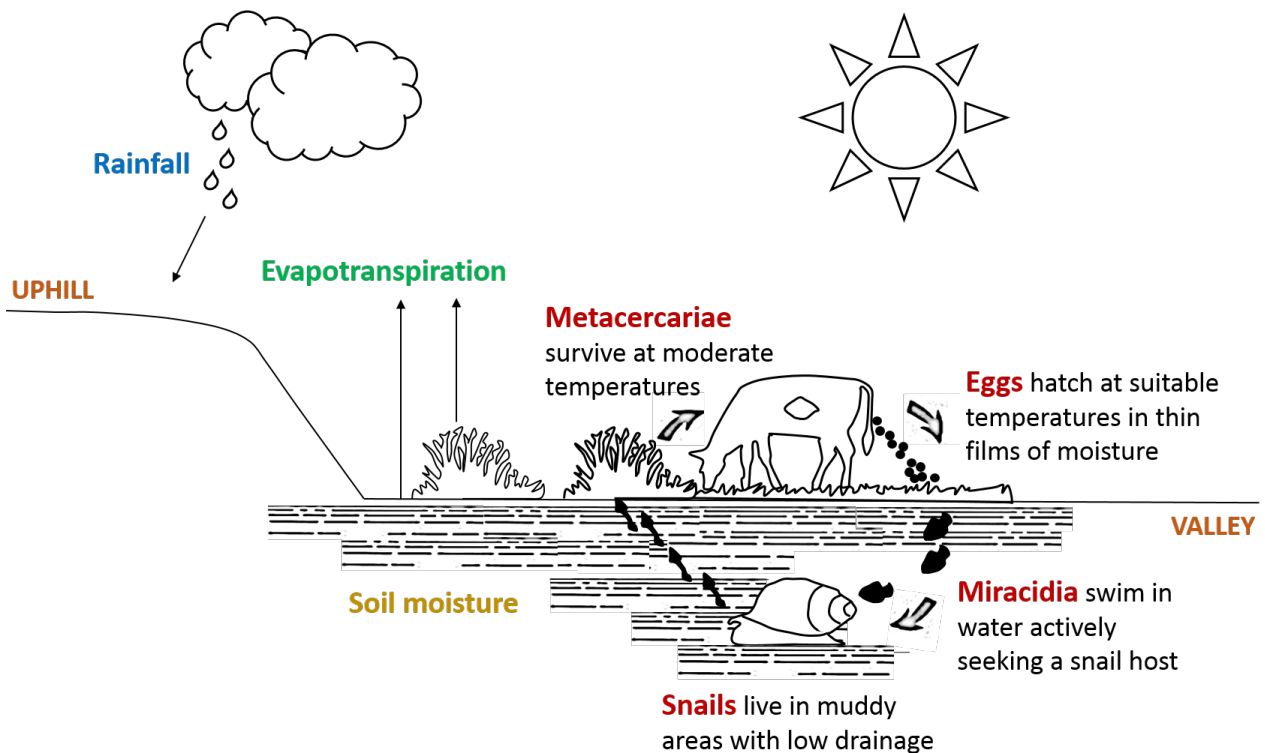

Figure 2: Simplified representation of the liver fluke life-cycle, with an amphibious mud snail serving as intermediate host.



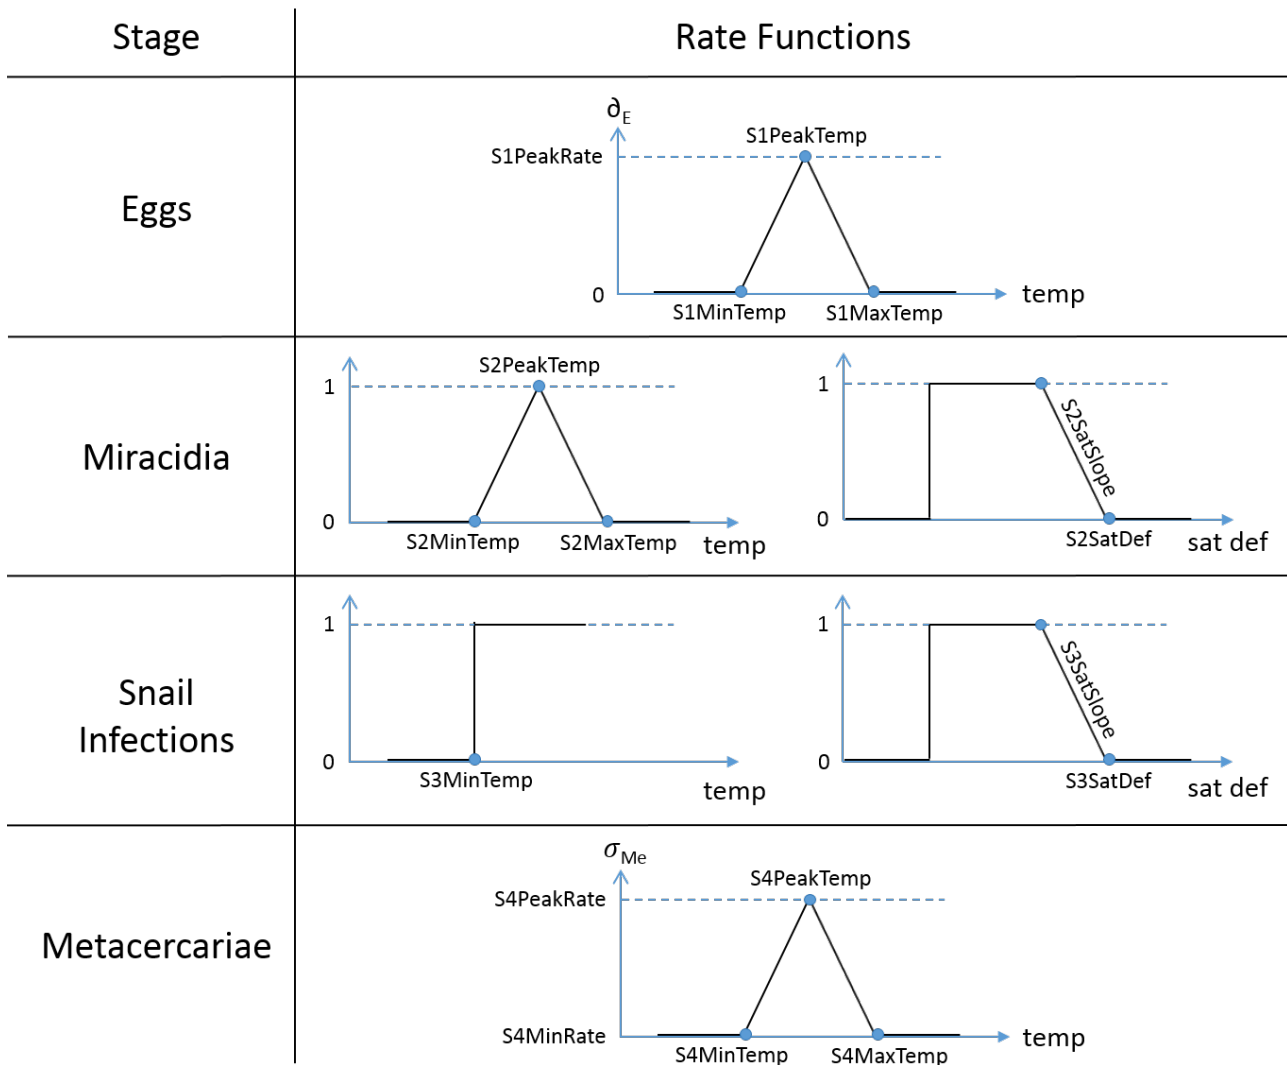

Figure 3: Functions used in HELF to calculate temperature and soil moisture-dependent development and mortality rates.

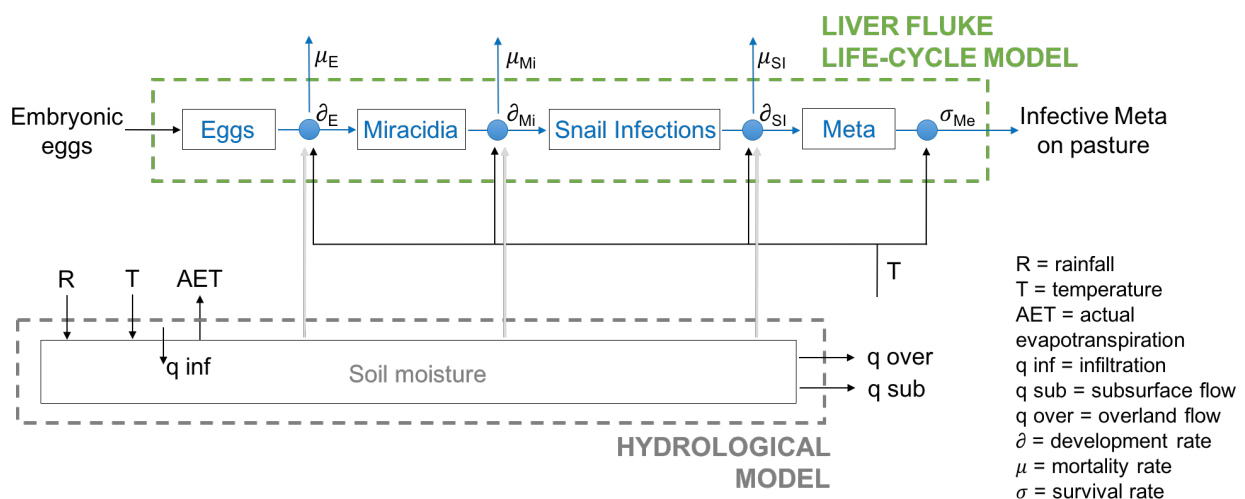

Figure 4: Simplified flow diagram of HELF, which integrates a hydrological and a liver fluke life-cycle component, to simulate the abundance of infective metacercariae (Meta) on pasture.

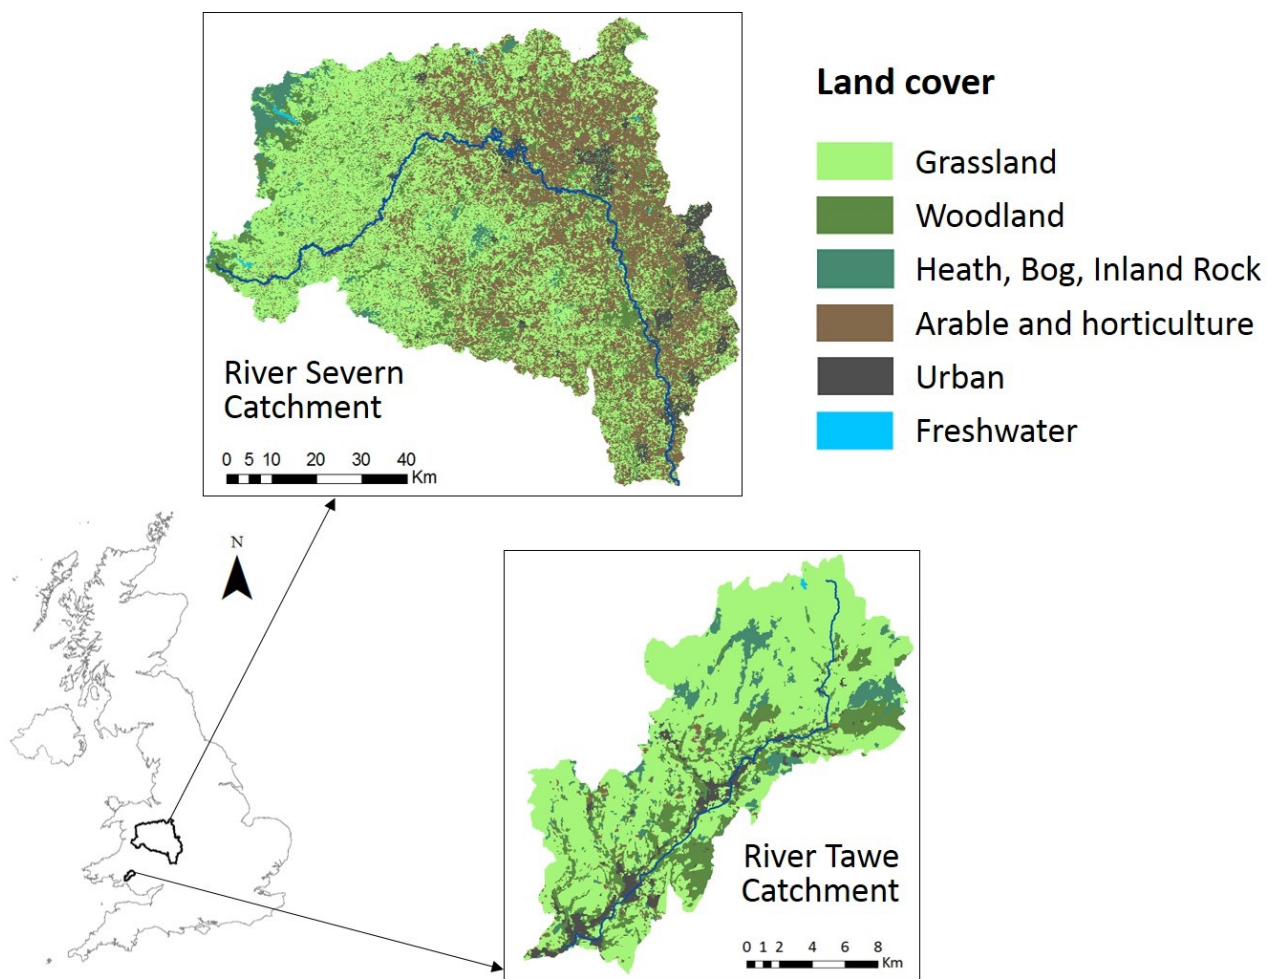

Figure 5: Location and land cover map of the Tawe and Severn Catchments (36).

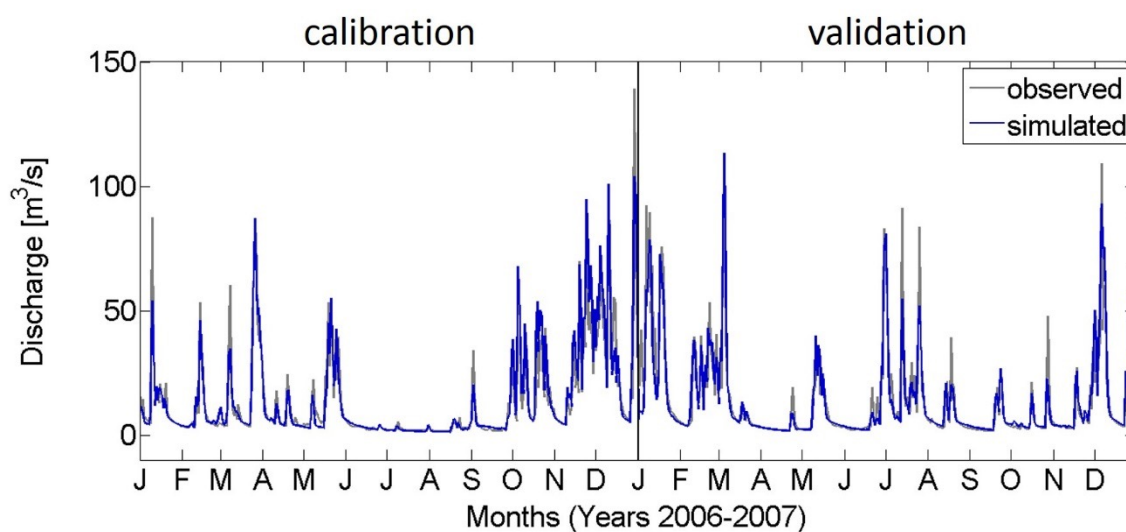

Figure 6: Extract of the calibration and validation periods using daily streamflow data for the River Tawe Catchment (total period is 2000-2006 for calibration and 2007-2010 for validation).

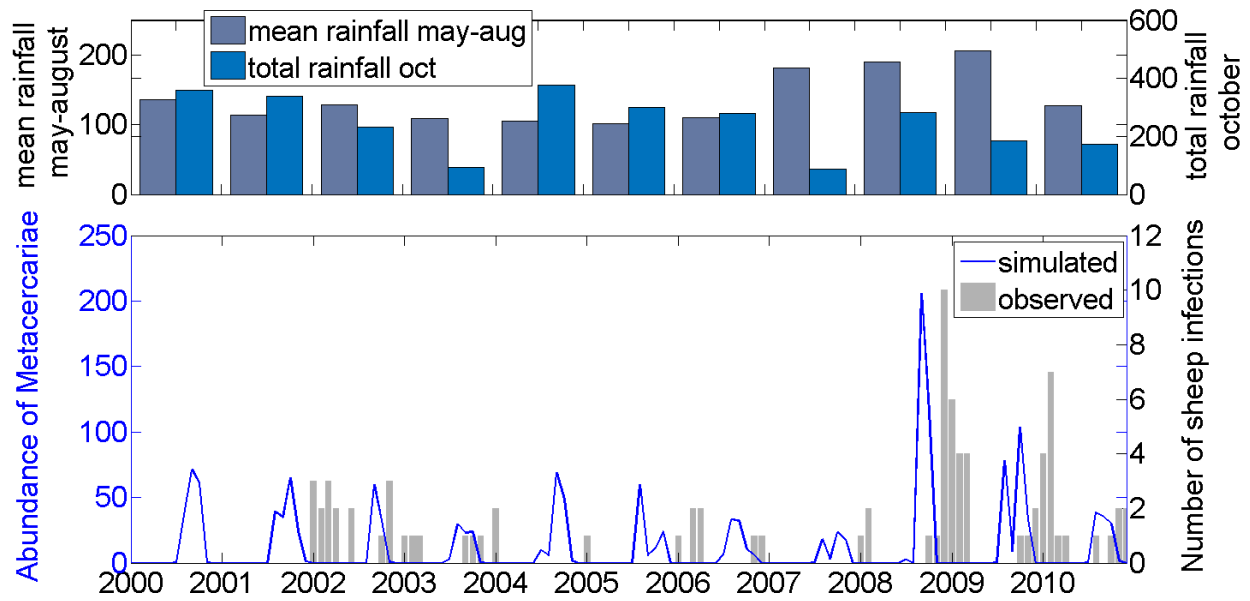

Figure 7: (bottom) Monthly comparison of simulated catchment average number of metacercariae and observed number of infections (VIDA data) over years 2000-2010 for the Tawe Catchment. (top) Years 2008 and 2009 have the highest mean summer rainfall within the simulation period, as well as a sufficiently wet autumn, resulting in high suitability for disease transmission.

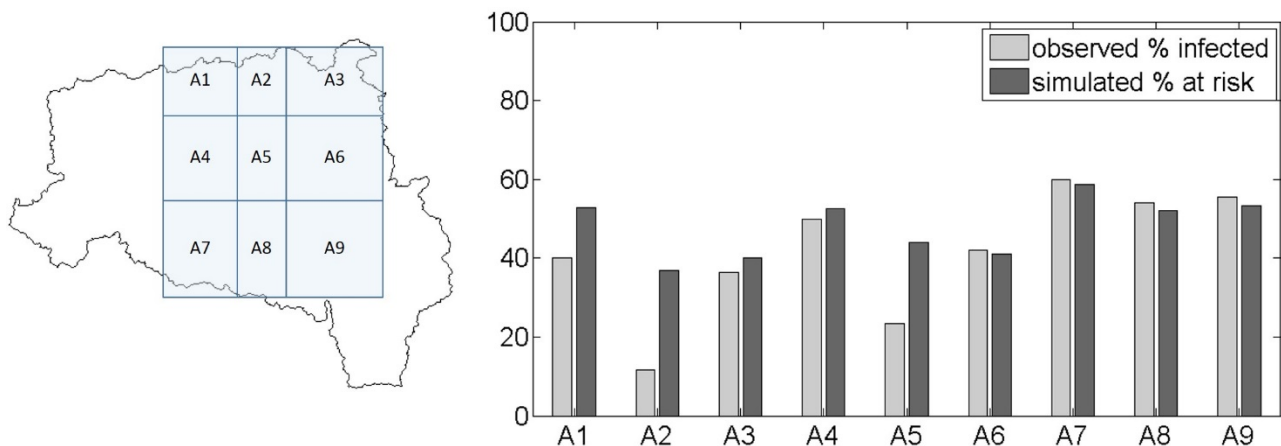

Figure 8: (left) Sub-areas within the Severn Catchment for which we have data points (i.e. cattle herds classified into infected and not-infected based on FECs collected over winter 2014-2015). (right) Comparison of simulated percentage of grid cells at risk of infection and observed percentage of infected herds for each sub-area.

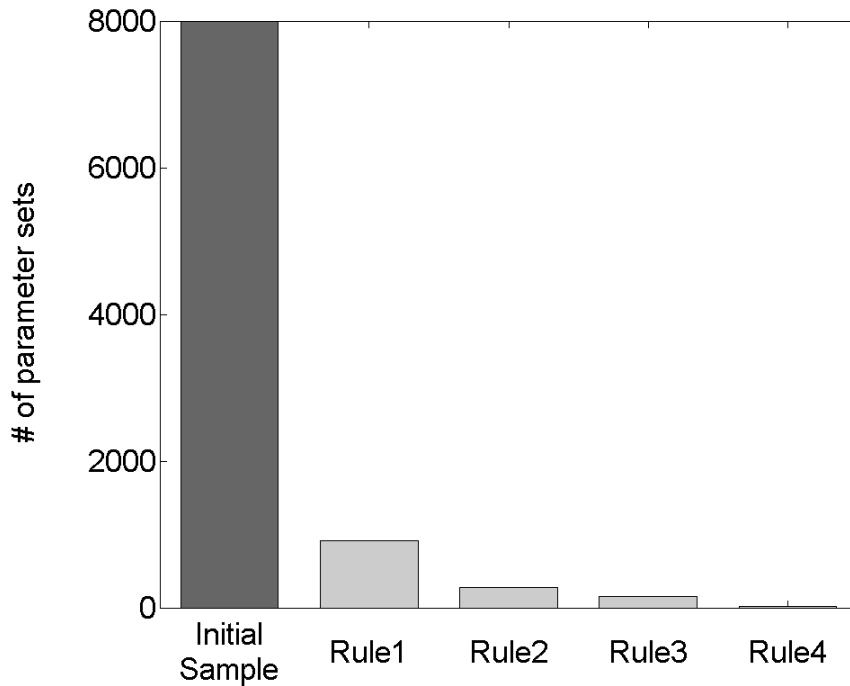

Figure 9: Evolution of the initial sample of 8000 parameterisations (each including the 22 epidemiological model parameters sampled from within their initial ranges) along the 4 confinement steps.

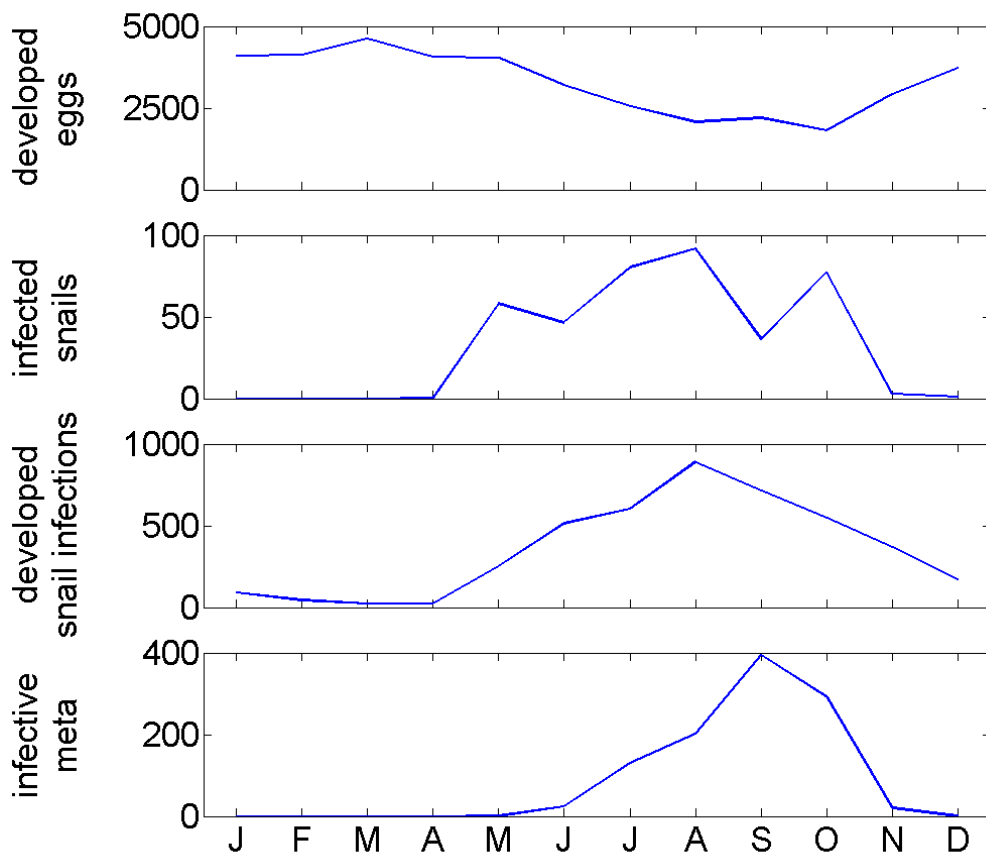

Figure 10: Monthly behaviour of the parasite life-cycle stages simulated with HELF for year 2001, as an example (median of the behavioural simulations).

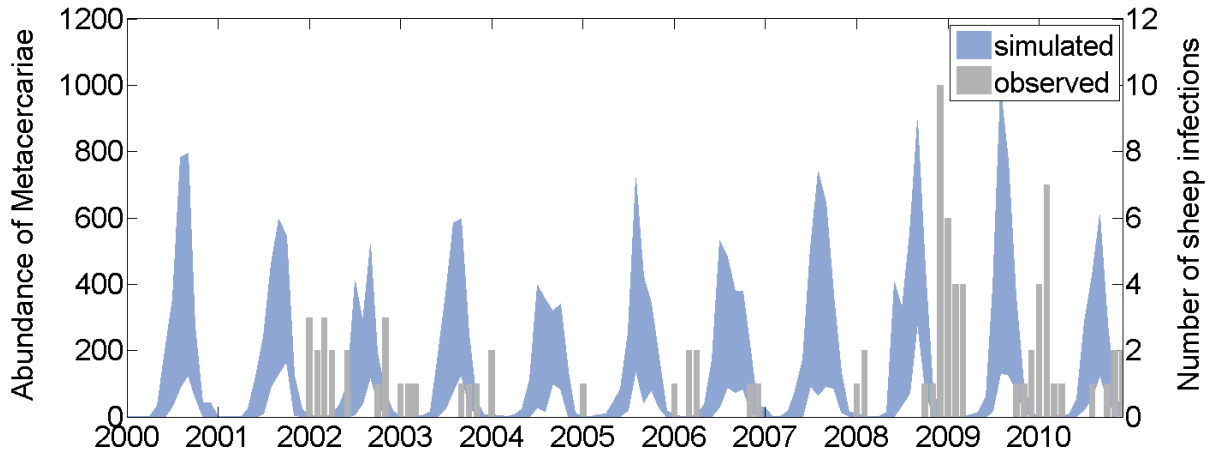

Figure 11: Monthly comparison of simulated catchment average number of metacercariae, obtained using the behavioural parameter sets (90% bounds), and observed number of infections (VIDA data) over years 2000-2010 for the Tawe Catchment.

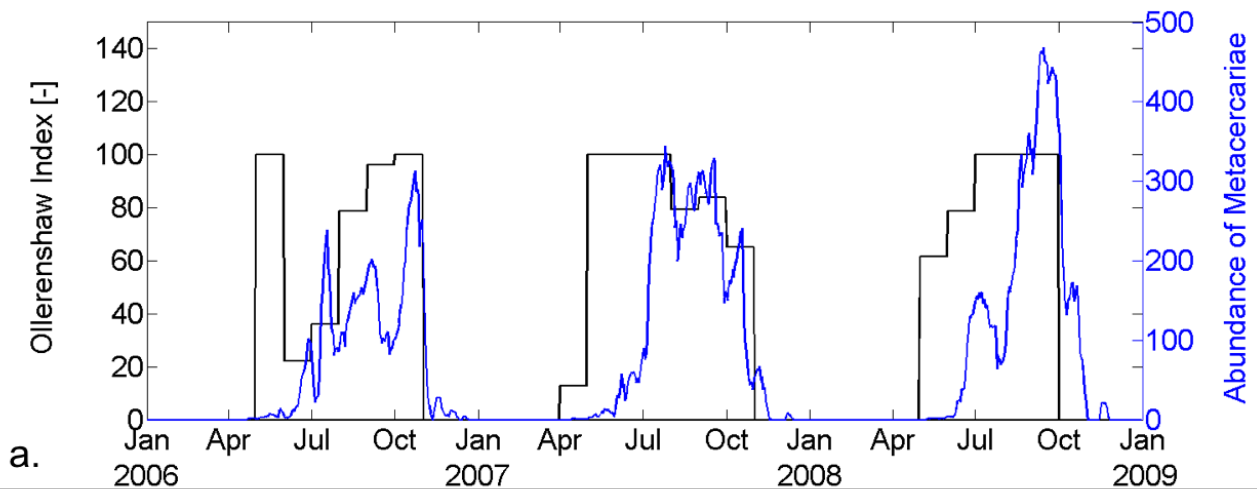

a.

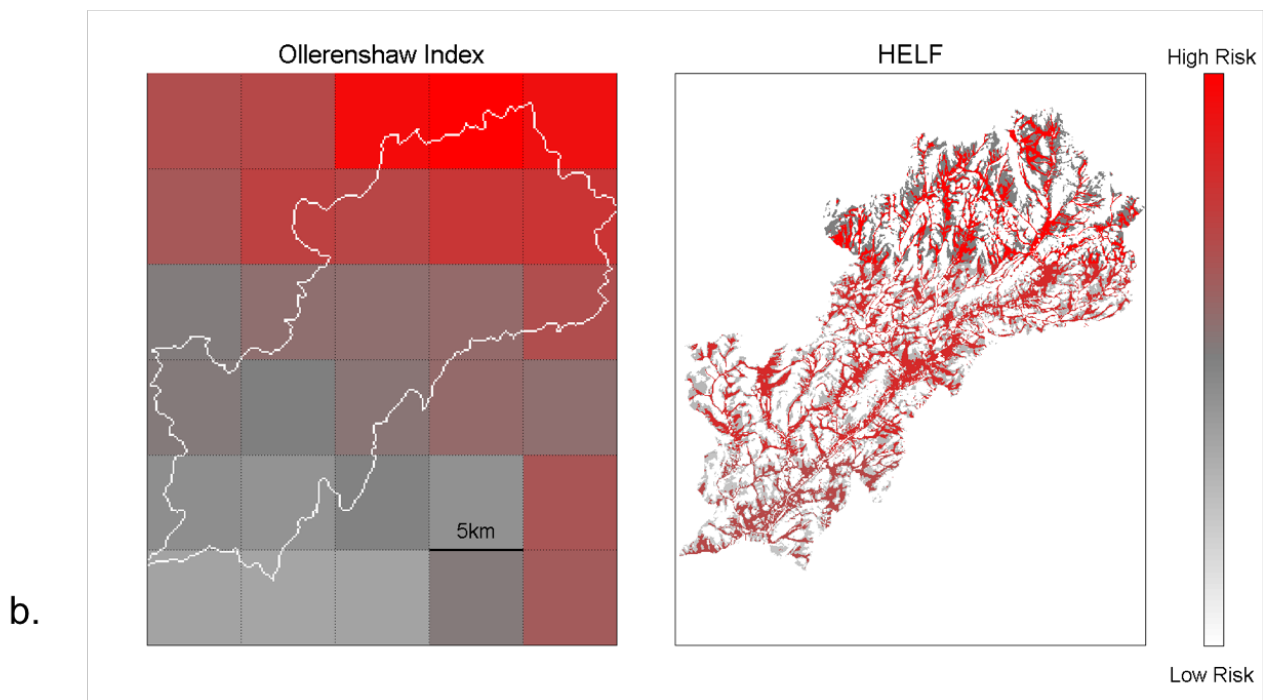

b.

Figure 12: (a) Comparison of the Ollerenshaw risk index pattern, in black, with the temporal dynamics of pasture contamination simulated with HELF (median of the behavioural sets) in blue, for an extract of the simulation period over the Tawe Catchment. (b) Risk maps for August 2006, as an example, obtained using the Ollerenshaw Index (left) and HELF (right).
